# Supplementary material
Source: HighWire-hosted journal article supplement (https://www.cancerbiomed.org/content/19/6/836)
Supplement: media-1 [file media-1.pdf]

# Supplementary materials

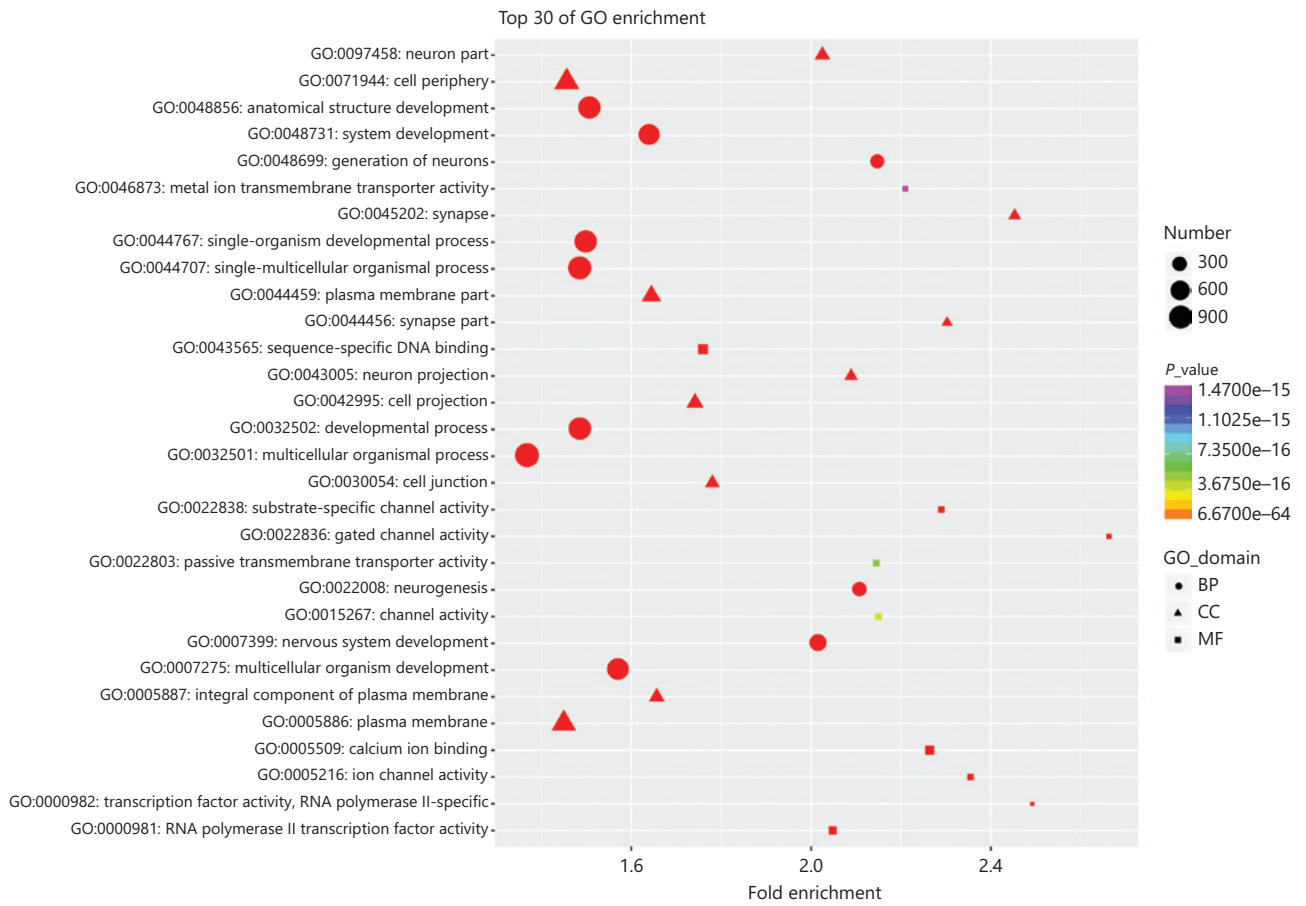

**Figure S1** Gene Ontology (GO) analysis of differentially methylated genes in EHMT2 + mantle cell lymphoma cases ( $\beta > 0.14$ ;  $P < 0.05$ ). The x-axis, enrichment factor; y-axis, the GO category. Red denotes small  $P$ -values and green denotes larger values. A round node denotes a biological process; the triangle denotes a cellular component and a square denotes a molecular function. The top 30 GO terms are shown.

**Table S1** The correlation between EHMT2 expression and the clinicopathological features in EHMT2 + mantle cell lymphoma cases

| Clinicopathological feature | EHMT2 (+)      EHMT2 (-) |          | <i>P</i> |
|-----------------------------|--------------------------|----------|----------|
|                             | <i>n</i>                 | <i>n</i> |          |
| Age (year)                  |                          |          | 0.281    |
| ≤60                         | 12                       | 3        |          |
| >60                         | 12                       | 8        |          |
| Sex                         |                          |          | 0.387    |
| Male                        | 17                       | 10       |          |
| Female                      | 7                        | 1        |          |
| Ki67                        |                          |          | 0.265    |
| ≤30%                        | 17                       | 5        |          |
| >30%                        | 7                        | 6        |          |
| LDH*                        |                          |          | 0.126    |
| ≤430                        | 0                        | 2        |          |
| >430                        | 19                       | 9        |          |
| Ann Arber stage             |                          |          | 0.684    |
| I                           | 8                        | 2        |          |
| II                          | 6                        | 4        |          |
| III                         | 1                        | 1        |          |
| IV                          | 9                        | 4        |          |

\*Five patients did not have detectable LDH levels.

**Table S2** The frequency distribution of all significantly differentially methylated CpG sites in EHMT2 + mantle cell lymphoma cases

| Methylation (β) difference | Hypermethylated CpG Sites <i>n</i> (%) | Hypomethylated CpG Sites <i>n</i> (%) | Total CpG Sites <i>n</i> (%) |
|----------------------------|----------------------------------------|---------------------------------------|------------------------------|
| ≥40%                       | 685 (51.20)                            | 2,859 (32.51)                         | 3,544 (34.97)                |
| ≥30–<40%                   | 653 (48.80)                            | 5,936 (67.49)                         | 6,589 (65.03)                |
| Total                      | 1,338                                  | 8,795                                 | 10,133                       |

**Table S3** The distribution of genomic regions for all significantly differentially methylated CpG sites in EHMT2 + mantle cell lymphoma cases compared with those in reactive hyperplasia cases

| Genomic region of CpG sites | All CpG sites   | Hypermethylation       | Hypomethylation        |
|-----------------------------|-----------------|------------------------|------------------------|
|                             |                 | CpG Sites <i>n</i> (%) | CpG Sites <i>n</i> (%) |
| CpG Island (CGI)            | 161,598 (18.64) | 1,112 (83.11)          | 98 (1.11)              |
| Shore (0–2 kb from CGI)     | 154,735 (17.85) | 161 (12.03)            | 766 (8.71)             |
| Shelf (4–6 kb from CGI)     | 61,811 (7.13)   | 15 (1.12)              | 542 (6.16)             |
| Open sea                    | 488,751 (56.38) | 50 (3.74)              | 7,389 (84.02)          |
| Total                       | 866,895         | 1,338                  | 8,795                  |

**Table S4** The biological characteristics of significant CpG sites identified in EHMT2 + mantle cell lymphoma cases

| Features                       | Significantly hypermethylated CpG sites | Significantly hypomethylated CpG sites |
|--------------------------------|-----------------------------------------|----------------------------------------|
| Infinium                       |                                         |                                        |
| I                              | 869                                     | 439                                    |
| II                             | 469                                     | 8,356                                  |
| Functional genome distribution |                                         |                                        |
| Promoter                       | 486                                     | 758                                    |
| Body                           | 270                                     | 3,601                                  |
| 3'UTR                          | 16                                      | 150                                    |
| Intergenic                     | 296                                     | 3,742                                  |
| Phantom promoter               |                                         |                                        |
| High CpG content               | 193                                     | 1                                      |
| Low CpG content                | 5                                       | 24                                     |

**Table S5** The top 30 significantly hypomethylated genes in EHMT2 + mantle cell lymphoma cases compared with those in reactive hyperplasia cases

| CpG site   | Mean MCL tissue | Mean RH tissue | Mean difference | Diffscore | Hypomethylated gene   |
|------------|-----------------|----------------|-----------------|-----------|-----------------------|
| cg06377160 | 0.8462059       | 0.2192933      | -0.6269127      | -75.48992 | SNX19                 |
| cg02592727 | 0.4547865       | 0.1461613      | -0.3086252      | -57.0156  | RDH13                 |
| cg25535027 | 0.487113        | 0.2483802      | -0.2387328      | -52.81252 | SLC39A7               |
| cg04940054 | 0.507884        | 0.2446689      | -0.2632152      | -52.20582 | LINC00939             |
| cg10456990 | 0.4365879       | 0.1763136      | -0.2602743      | -51.72263 | SIM2                  |
| cg11369071 | 0.7074636       | 0.3901251      | -0.3173386      | -51.3016  | LOC100270746; C6orf41 |
| cg23412091 | 0.6139717       | 0.2862514      | -0.3277203      | -50.02227 | TMEM41A               |
| cg11733675 | 0.5292104       | 0.2935199      | -0.2356906      | -49.86818 | NLGN1                 |
| cg22717227 | 0.4211193       | 0.1759834      | -0.2451359      | -49.55123 | C10orf53              |
| cg10938233 | 0.5663867       | 0.3462509      | -0.2201358      | -49.11399 | CSMD1                 |
| cg24487279 | 0.4838578       | 0.07269558     | -0.4111622      | -48.73317 | OXR1                  |
| cg22204479 | 0.590589        | 0.1327952      | -0.4577938      | -48.49442 | NKX2-4                |
| cg22982368 | 0.4318252       | 0.08350327     | -0.3483219      | -48.24937 | PAX6                  |
| cg11708616 | 0.4562688       | 0.08895898     | -0.3673099      | -47.4348  | FOXQ1                 |
| cg10648197 | 0.4631557       | 0.1696359      | -0.2935198      | -47.23201 | SPAG6                 |
| cg16937769 | 0.4428068       | 0.204212       | -0.2385948      | -46.59911 | HOXC4; HOXC6; HOXC5   |
| cg23622153 | 0.4364784       | 0.1025535      | -0.3339249      | -45.83541 | DSEL; LOC643542       |
| cg05181186 | 0.7016985       | 0.05343278     | -0.6482657      | -45.39481 | CDS1                  |
| cg05563287 | 0.5781229       | 0.2386259      | -0.339497       | -45.30098 | ADAMTS17              |
| cg19024344 | 0.6073342       | 0.1628704      | -0.4444638      | -45.18105 | DLC1                  |
| cg18198999 | 0.4914254       | 0.1786578      | -0.3127676      | -45.05529 | DMRTA2                |
| cg18063017 | 0.5308674       | 0.2182848      | -0.3125826      | -45.03379 | LHX4                  |
| cg24925400 | 0.5650398       | 0.288571       | -0.2764688      | -44.78916 | PITX2                 |
| cg07588113 | 0.354783        | 0.09480181     | -0.2599812      | -44.6541  | C7orf63               |
| cg23649435 | 0.5065351       | 0.06638894     | -0.4401462      | -43.82687 | STOX2                 |
| cg04524652 | 0.4272011       | 0.05893176     | -0.3682693      | -43.45611 | FAM160A1              |
| cg20250341 | 0.4396492       | 0.2382616      | -0.2013876      | -43.34166 | C17orf44              |
| cg22299454 | 0.4504218       | 0.116345       | -0.3340768      | -43.26916 | MARCH1                |
| cg19909787 | 0.4934257       | 0.1125836      | -0.3808421      | -43.01773 | HMX2                  |
| cg04390523 | 0.5996584       | 0.1323086      | -0.4673498      | -42.95142 | EDNRB                 |

**Table S6** The top 30 significantly hypermethylated genes in EHMT2 + mantle cell lymphoma cases compared with those in reactive hyperplasia cases

| CpG site   | Mean MCL tissue | Mean RH tissue | Mean difference | Diffscore | Hypermethylated gene |
|------------|-----------------|----------------|-----------------|-----------|----------------------|
| cg23230830 | 0.3178573       | 0.7388198      | 0.4209625       | 60.75093  | LOC646627            |
| cg11236641 | 0.1689083       | 0.7677054      | 0.5987971       | 56.51852  | PRDM16               |
| cg25224813 | 0.1847852       | 0.604936       | 0.4201508       | 56.05684  | PDGFC                |
| cg10499172 | 0.1291039       | 0.4468592      | 0.3177553       | 55.1452   | DCPS                 |
| cg12770539 | 0.1585084       | 0.5785133      | 0.4200049       | 53.87254  | EEPDI                |
| cg25835179 | 0.1381735       | 0.444884       | 0.3067105       | 53.15146  | ACY3                 |
| cg09184271 | 0.1979736       | 0.4432445      | 0.2452709       | 52.77735  | LOC102724188         |
| cg10572188 | 0.4168094       | 0.7306411      | 0.3138317       | 52.0444   | CCDC52               |
| cg06581818 | 0.4698206       | 0.6787459      | 0.2089253       | 51.51563  | CEACAM20             |
| cg26935044 | 0.1929822       | 0.6279361      | 0.4349538       | 51.24723  | CCL4                 |
| cg00869927 | 0.1722254       | 0.5451878      | 0.3729625       | 50.25766  | SGIP1                |
| cg09740425 | 0.4776053       | 0.7732241      | 0.2956189       | 49.49221  | MED12L               |
| cg20819895 | 0.1519993       | 0.4424257      | 0.2904264       | 48.20529  | MYO1D                |
| cg02643433 | 0.1653855       | 0.4360989      | 0.2707134       | 48.18273  | DSP                  |
| cg09163930 | 0.1953747       | 0.533519       | 0.3381443       | 47.71744  | PDGFRB               |
| cg14514130 | 0.4666558       | 0.7356675      | 0.2690116       | 47.49101  | NFASC                |
| cg02935847 | 0.2580396       | 0.6690312      | 0.4109915       | 47.19162  | CELF6                |
| cg19555191 | 0.376651        | 0.6056705      | 0.2290194       | 46.91182  | DPP6                 |
| cg07395331 | 0.5114742       | 0.7993112      | 0.2878371       | 46.90426  | PPM1H                |
| cg12166899 | 0.3803716       | 0.7885495      | 0.4081779       | 46.54666  | JAG2                 |
| cg07082484 | 0.2330821       | 0.5330534      | 0.2999713       | 46.53505  | SH3RF1               |
| cg01258789 | 0.2288738       | 0.5497532      | 0.3208793       | 46.28978  | CRB1                 |
| cg19007141 | 0.4268272       | 0.7196074      | 0.2927801       | 46.27856  | MAML3                |
| cg03610280 | 0.1651199       | 0.4927088      | 0.3275889       | 46.23247  | ENTPD1               |
| cg21718826 | 0.4849877       | 0.7668172      | 0.2818294       | 46.19204  | NUDT16L1             |
| cg00632811 | 0.09330513      | 0.5071465      | 0.4138414       | 46.17984  | PWP1                 |
| cg07579107 | 0.1863194       | 0.5948922      | 0.4085729       | 46.07104  | WDR72                |
| cg14235273 | 0.5881255       | 0.8547997      | 0.2666742       | 45.98321  | ABI3                 |
| cg14454798 | 0.223995        | 0.4932028      | 0.2692078       | 45.86175  | CPEB4                |
